# Supplementary material for: Fabrication of mono-dispersed silica-coated quantum dot-assembled magnetic nanoparticles
Source: Royal Society of Chemistry journal article supplement (doi:10.1039/c5ra03139g), 2015-01-01
Supplement: c5ra03139g1.pdf [file c5ra03139g1.pdf]

# Supporting Information

## *Fabrication of Mono-dispersed Silica-coated Quantum Dot-assembled Magnetic Nanoparticles*

*San Kyeong<sup>1</sup>, Cheolhwan Jeong<sup>1</sup>, Han Young Kim<sup>2,3</sup>, Do Won Hwang<sup>2,3</sup>, Homan Kang<sup>4</sup>, Jin-Kyoung Yang<sup>1</sup>, Dong Soo Lee<sup>2,3</sup>, Bong-Hyun Jun<sup>5,\*</sup>, and Yoon-Sik Lee<sup>1,\*</sup>*

<sup>1</sup>*School of Chemical and Biological Engineering, Seoul National University, Seoul 151-747, Republic of Korea*

<sup>2</sup>*Department of Nuclear Medicine, Seoul National University College of Medicine, Seoul 110-744, Republic of Korea*

<sup>3</sup>*Department of Molecular Medicine and Biopharmaceutical Sciences, Graduate School of Convergence Science and Technology, Seoul National University, Seoul 151-747, Republic of Korea*

<sup>4</sup>*Department of Electrical Engineering and Computer Science, Seoul National University, Seoul 151-747, Republic of Korea*

<sup>5</sup>*Department of Bioscience and Biotechnology, Konkuk University, Seoul 143-701, Republic of Korea*

Table S1. Classification of the fabricated NPs.

| Nanoparticles                                                   | Structure of exploited QDs | Emission peak of QD fluorescence | Property of exploited silica NPs                                  |
|-----------------------------------------------------------------|----------------------------|----------------------------------|-------------------------------------------------------------------|
| SiO <sub>2</sub> @red-QDs NPs                                   | CdSe@CdS@ZnS               | 620 nm                           | Bare SiO <sub>2</sub> NPs <sup>a</sup>                            |
| Fe <sub>3</sub> O <sub>4</sub> @SiO <sub>2</sub> @red-QDs NPs   | CdSe@CdS@ZnS               | 620 nm                           | Fe <sub>3</sub> O <sub>4</sub> @SiO <sub>2</sub> NPs <sup>b</sup> |
| Fe <sub>3</sub> O <sub>4</sub> @SiO <sub>2</sub> @green-QDs NPs | CdSe@CdS@ZnS               | 540 nm                           | Fe <sub>3</sub> O <sub>4</sub> @SiO <sub>2</sub> NPs <sup>b</sup> |

*a* : NPs which were fabricated using general Stöber method[1].

*b* : NPs which were fabricated using by encapsulating PVP-coated Fe<sub>3</sub>O<sub>4</sub> NPs[2].

[1] Stober, W., A. Fink, and E. Bohn, *Controlled Growth of Monodisperse Silica Spheres in Micron Size Range*. Journal of Colloid and Interface Science, 1968. **26**(1): p. 62-&

[2] Rho, W.Y., et al., *Facile synthesis of monodispersed silica-coated magnetic nanoparticles*. Journal of Industrial and Engineering Chemistry, 2014. **20**(5): p. 2646-2649.

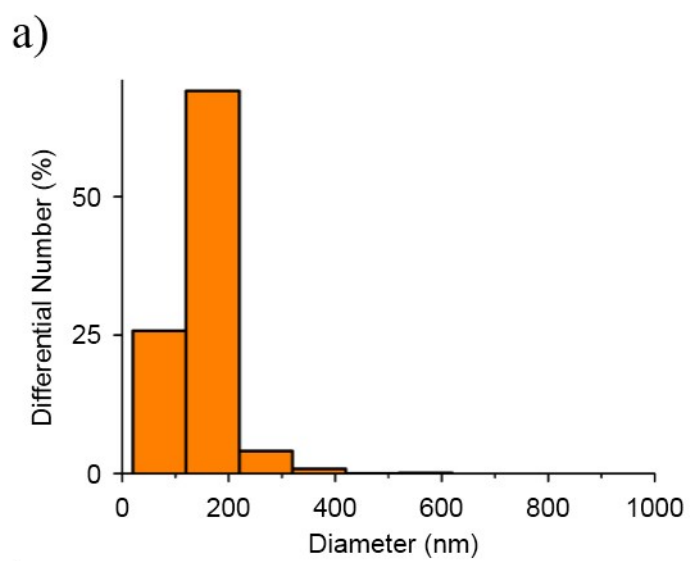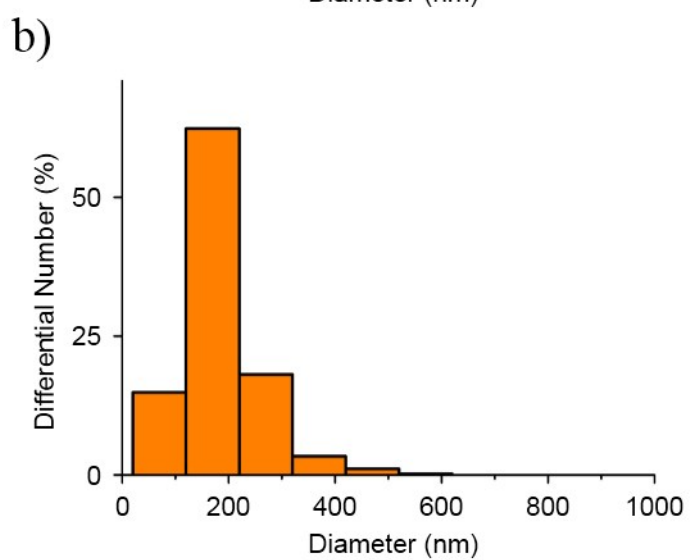

Figure S1. Hydrodynamic size distribution analysis of NPs. a)  $\text{Fe}_3\text{O}_4@\text{SiO}_2$  NPs, b)  $\text{Fe}_3\text{O}_4@\text{SiO}_2@\text{QDs}$  NPs.

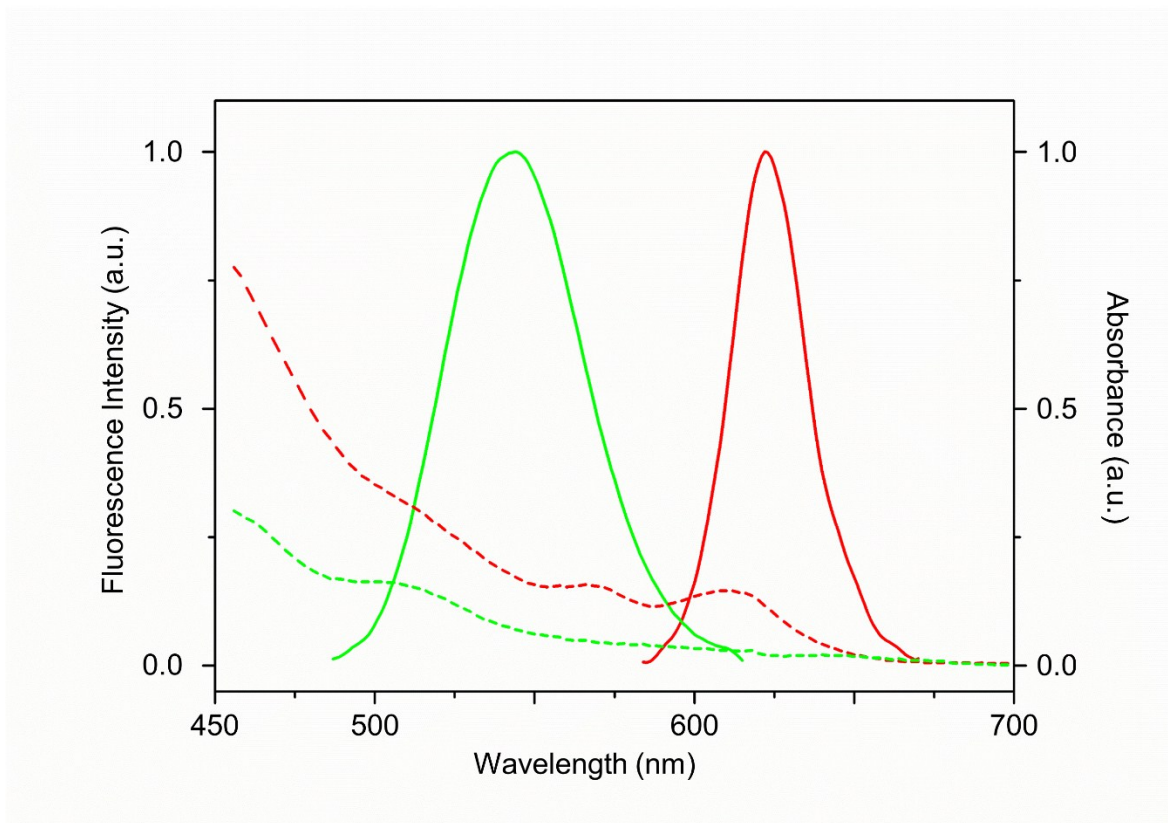

Figure S2. Ultraviolet (UV) absorption (dashed line) and fluorescence emission (solid line) spectra of the original red and green QDs.

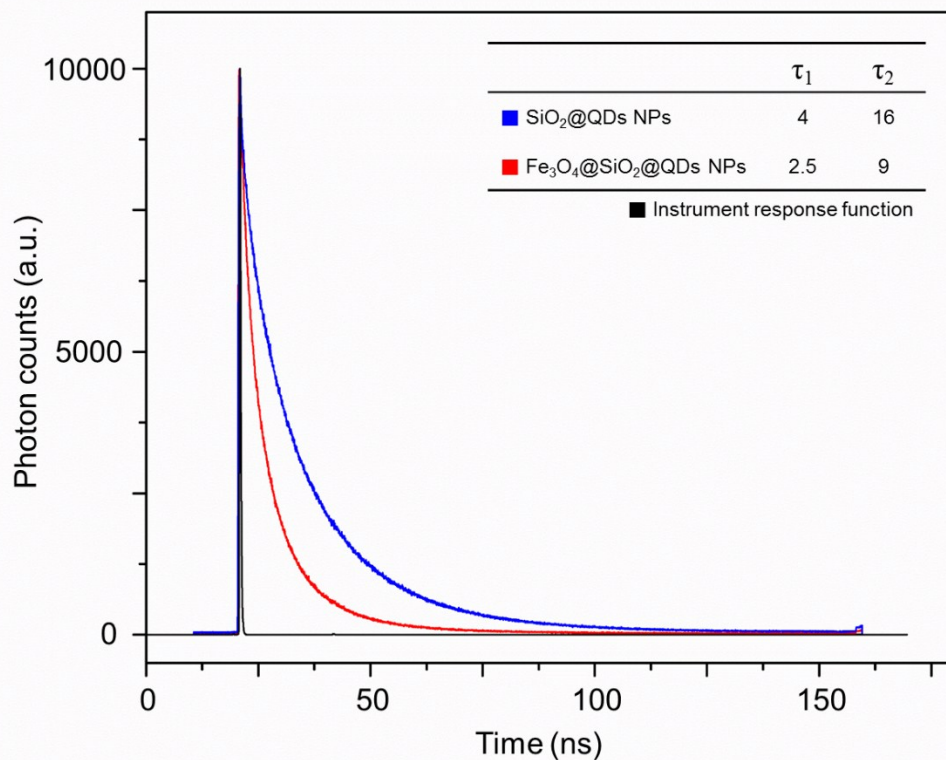

Figure S3. Fluorescence decay (405 nm excitation) of SiO<sub>2</sub>@red-QDs NPs and Fe<sub>3</sub>O<sub>4</sub>@SiO<sub>2</sub>@red-QDs NPs monitored at 583/75 nm and the corresponding instrument response function. The decays were fitted using a multi-exponential function and exhibited at least two distinct lifetimes ( $\tau_1$  and  $\tau_2$ ).
